1 **Marine sponges as Chloroflexi hot-spots: Genomic insights and high resolution**  
2 **visualization of an abundant and diverse symbiotic clade**

3

4

5

6 Kristina Bayer<sup>1</sup>, Martin T. Jahn<sup>1,2</sup>, Beate M. Slaby<sup>1</sup>, Lucas Moitinho-Silva<sup>3</sup>, and Ute  
7 Hentschel<sup>1,4</sup>

8

9 <sup>1</sup>GEOMAR-Helmholtz Centre for Ocean Research, RD3-Marine Ecology, RU-Marine  
10 Microbiology, Duesternbrooker Weg 20, 24105 Kiel, Germany

11

12 <sup>2</sup>University of Wuerzburg, Imaging Core Facility at the Theodor-Boveri-Institute of Bioscience  
13 Am Hubland, 97074 Wuerzburg, Germany

14

15 <sup>3</sup>Centre for Marine Bio-Innovation, University of New South Wales, Biological Sciences  
16 Building D26, Sydney, NSW, Australia, 2052

17

18 <sup>4</sup>Christian-Albrechts University of Kiel, Christian-Albrechts-Platz 4, 24118 Kiel, Germany

19

20

21

22

23

24

25

26

27

28

29 **Abstract**

30 *Chloroflexi* represent a widespread, yet enigmatic bacterial phylum. Meta- and single cell  
31 genomics were performed to shed light on the functional gene repertoire of *Chloroflexi*  
32 symbionts from the HMA sponge *Aplysina aerophoba*. Eighteen draft genomes were  
33 reconstructed and placed into phylogenetic context of which six were investigated in detail.  
34 Common genomic features of *Chloroflexi* sponge symbionts were related to central energy  
35 and carbon converting pathways, amino acid and fatty acid metabolism and respiration.  
36 Clade specific metabolic features included a massively expanded genomic repertoire for  
37 carbohydrate degradation in Anaerolineae and Caldilineae genomes, and amino acid  
38 utilization as nutrient source by SAR202. While Anaerolineae and Caldilineae import  
39 cofactors and vitamins, SAR202 genomes harbor genes encoding for co-factor biosynthesis.  
40 A number of features relevant to symbiosis were further identified, including CRISPRs-Cas  
41 systems, eukaryote-like repeat proteins and secondary metabolite gene clusters. *Chloroflexi*  
42 symbionts were visualized in the sponge extracellular matrix at ultrastructural resolution by  
43 FISH-CLEM method. *Chloroflexi* cells were generally rod-shaped and about 1  $\mu\text{m}$  in length,  
44 albeit displayed different and characteristic cellular morphotypes per each class. The  
45 extensive potential for carbohydrate degradation has been reported previously for *Ca.*  
46 *Poribacteria* and SAUL, typical symbionts of HMA sponges, and we propose here that HMA  
47 sponge symbionts collectively engage in degradation of dissolved organic matter, both labile  
48 and recalcitrant. Thus sponge microbes may not only provide nutrients to the sponge host,  
49 but also contribute to DOM re-cycling and primary productivity in reef ecosystems via a  
50 pathway termed the “sponge loop”.

51

52

53

54

55

56

## 57 Introduction

58 Sponges (Porifera) represent one of the oldest, still extant animal phyla. Fossil  
59 evidence shows their existence in the Precambrian long before the radiation of all other  
60 animal phyla (1, 2). Nowadays, sponges are globally distributed in all aquatic habitats from  
61 warm tropical reefs to the cold deep sea and are even present in freshwater lakes and  
62 streams (3). Sponges are increasingly recognized as important components of marine  
63 environments, due to their immense filter-feeding capacities and consequent impacts upon  
64 coastal food webs and biogeochemical (e.g., carbon, nitrogen) cycles (4, 5). Many marine  
65 sponges contain dense and diverse microbial consortia within their extracellular matrix  
66 (mesohyl). To date, 41 bacterial phyla (among them many candidate phyla) have been  
67 recorded from sponges, with recent amplicon sequencing studies suggesting up to 14,000  
68 operational taxonomic units (OTUs) per sponge individual (6, 7). Sponges also constitute one  
69 of the most abundant natural sources of secondary metabolites, which are of commercial  
70 interest for the development of pharmaceuticals and new drugs (8) and are often produced  
71 by the microbial symbionts (9, 10).

72 Sponges can be classified into the so-called “high microbial abundance sponges”  
73 (HMA) harboring dense and diverse microbial consortia within their mesohyl tissues, and the  
74 “low microbial abundance sponges” (LMA) containing microbial numbers in the order of those  
75 found in seawater (11–13). While HMA sponges are enriched in *Chloroflexi*, *Acidobacteria*,  
76 *Ca. Poribacteria*, the LMA sponges are dominated by *Gamma*- and *Betaproteobacteria* as  
77 well as *Cyanobacteria*. Differences have also been observed with respect to functional gene  
78 content (14) pumping rates (15), and exchange of carbon and nitrogen compounds (16).  
79 There is mounting evidence that HMA sponges are specialized to feed on DOM while the  
80 LMA sponges preferably feed on particulate organic matter (POM), (7, 17, 18). It is thus  
81 tempting to speculate that the symbiotic microbiota of HMA sponges is involved in DOM  
82 degradation, and indeed, the microbiomes analyzed so far encode a diverse repertoire for  
83 carbon metabolism pathways and transporters for low molecular weight compounds (10, 19–

84 21). However, the precise fluxes and mechanisms how DOM and POM are taken up and  
85 processed within the sponge holobiont remain unknown.

86 In the present study, we focused our metagenomic analyses on *Chloroflexi* as  
87 abundant and characteristic, yet understudied members of HMA sponge microbiomes. The  
88 phylum *Chloroflexi* comprises taxonomically and physiologically highly diverse lineages that  
89 populate a wide range of habitats (22–25) including the deep sea (26), uranium-  
90 contaminated aquifers (27) and the human oral cavity and gut (28, 29). *Chloroflexi*  
91 metabolism is very diverse, ranging from anoxygenic photosynthesis, obligate  
92 aerobic/anaerobic heterotrophs, thermophiles, halophiles, clades capable of reductive  
93 halogenation, and even predators with gliding motility. Because only few *Chloroflexi* lineages  
94 have been cultivated (30) and because draft genomes are limited in number (26, 31), the  
95 specific functions of *Chloroflexi* within the ecosystem context remain frequently unknown.

96 Members of *Chloroflexi* are members of HMA sponge microbiomes, with  
97 representatives of classes SAR202, Anaerolineae, and Caldilineae, being most abundant  
98 (32). Visualization of *Chloroflexi* by fluorescence *in situ* hybridization (FISH) revealed bright  
99 and abundant signals (33, 34). Because *Chloroflexi* likely play an important role in the HMA  
100 sponge holobiont, we aimed (i) to assess the relative abundances and distribution in diverse  
101 HMA sponge species by using the largest dataset currently available (EMP sponge  
102 microbiome), (ii) to provide an updated phylogenetic analysis, (iii) to characterize the  
103 functional gene repertoire with a particular focus on carbon degradation and symbiotic  
104 lifestyle, and, (iv) to visualize *Chloroflexi* in mesohyl tissues at ultrastructural resolution by  
105 FISH-CLEM methodology. We applied a broad range of state-of-the-art methods, from global  
106 sponge surveys to single cell genomics and microscopy, to acquire comprehensive insights  
107 into the lifestyle of *Chloroflexi* symbionts.

108

109

110

111

## 112 **Materials and methods**

### 113 *Relative abundance of Chloroflexi in high microbial abundance (HMA) sponges*

114 To investigate the abundance of the bacterial phylum *Chloroflexi* on a global scale, sponge  
115 species, microbiome data from HMA sponges, classified and predicted (Cluster 1), were  
116 obtained from Moitinho-Silva *et al.* (2017). This dataset is a rarefied operational taxonomic  
117 unit (OTU) abundance matrix (23,455) from the mothur processed data of the Sponge  
118 Microbiome Project (32). Abundance of *Chloroflexi* OTUs were grouped according to the  
119 class level based on SILVA taxonomy (36). Relative abundances were calculated and  
120 displayed using the superheat R package (37).

121

### 122 *Sponge sampling, cell separation and handling*

123 The *Chloroflexi* bins from an *Aplysina aerophoba* microbiome derived Illumina data set had  
124 been generated in a previous study (21). Briefly, a sponge individual was collected from  
125 Piran, Slovenia (45.5099 N; 13.5600 E), microbial cells were enriched from sponge tissues  
126 by differential centrifugation, The metagenomic DNA was isolated (33), sequenced (Illumina  
127 HiSeq2000 platform, 150 bp paired-end reads), and quality filtered by DOE Joint Genome  
128 Institute (JGI). Sequence data of metagenome bins are available from IMG under the Gold  
129 study ID Gs0099546 (Table 1). Data normalization, assembly and binning were conducted as  
130 described previously [Illumina-only assembly and binning published in (21)].

131 Single cells were sorted and their DNA amplified as described in Kamke *et al.* (19) and  
132 stored at -80°C in 96-well plates. Single amplified genomes (SAGs) were PCR screened  
133 using the universal primers 27f and 1492r to detect *Chloroflexi* 16S rRNA genes (38). SAGs  
134 tested positive for the presence of a single *Chloroflexi* 16S rRNA gene, were sequenced at  
135 GATC GmbH (Konstanz, Germany) on an Illumina MiSeq Personal Sequencer (300 bp;  
136 paired-end). Sequences were decontaminated using the IMG/EMR (Integrated microbial  
137 genomes & environmental samples) web tools following the single cell data decontamination  
138 protocol provided at JGI webpage  
139 (<https://img.jgi.doe.gov/w/doc/SingleCellDataDecontamination.pdf>). Contamination-free data

140 of SAGs are available from IMG under the Gold study ID Gs0114494 (<http://img.jgi.doe.gov/>,  
141 for more details see Table 1).

142

#### 143 *Phylogenetic tree construction*

144 16S rRNA genes from one metagenome bin and all 13 single amplified genomes (SAGs)  
145 were manually quality checked and aligned with several reference sequences obtained from  
146 Silva database (SSU release 132) using the SINA aligner (39). The program MEGA 7.0.4  
147 (40) was used for the protein alignment based on amino acid sequences of nine ribosomal  
148 proteins (L2, L4, L14, L15, L22, L24, S3, S17, S19), determination of best tree construction  
149 model (GTR+G+I model for 16S rRNA genes and JTT model for proteins), and final tree  
150 construction (Neighbor Joining method). As references for the protein tree, protein  
151 sequences from all public available *Chloroflexi* genomes were included (Suppl. table 1). Due  
152 to low genome completeness, some of the used proteins were missing in the regarding  
153 genomes. The trees were visualized using iTOL (interactive tree of life;  
154 <http://www.itol.embl.de/>).

155

#### 156 *Fluorescence in situ hybridization and FISH-CLEM*

157 FISH probes were designed based on the 16S rRNA gene alignment for sponge specific  
158 clades within the classes Anaerolineae and Caldilineae using the probe design tool  
159 implemented in ARB (41). Candidate probes were tested *in silico* for their specific  
160 hybridization conditions using different target and non-target reference sequences using  
161 mathFISH (<http://mathfish.cee.wisc.edu/>). Probes with best performance were tested for  
162 hybridization specificity on fixed (4% paraformaldehyde) *A. aerophoba* microbial cell  
163 preparations as described in Fieseler *et al.* (33) using formamide (FA) concentration  
164 gradients. Finally, we used for Caldilineae probe Cal825 (5'-[Cy3]-  
165 ACACCGCCACACCTCGT-[Cy3]-3', *E.coli* binding position: 825-843) and for Anaerolineae  
166 probe Ana1005 (5'-[Alexa647]-TCCGCTTTCGCTTCCGTA-[Alexa647]-3', *E.coli* binding  
167 position: 1005-1023). Additionally, probe SAR202-104 (5'-[Alexa488]-

168 GTTACTCAGCCGTCTGCC-[Alexa488]-3', *E.coli* binding position: 104-122) was used to  
169 identify members of SAR202 group in sponges (42). All probes were double labelled at 5'-  
170 and 3'- ends (Sigma-Aldrich, Steinheim, Germany). To establish the newly designed sponge  
171 specific *Chloroflexi* probes and the previously published SAR202-104R probe for the sponge  
172 microbiome, FISH conditions were optimized using microbial cell preparations from *A.*  
173 *aerophoba*. The three probes did not co-localize using 10%, 20%, and 30% FA  
174 demonstrating specific binding of the probes to the *Chloroflexi* classes/ clades in standard  
175 FISH experiments (Figure S6).

176 For ultrastructural visualization of sponge *Chloroflexi*, we applied a recently  
177 established FISH-CLEM protocol (Fluorescence *in situ* Hybridization Correlated Light and  
178 Electron Microscopy (43). Briefly, freshly sampled *A. aerophoba* sponges were transported to  
179 the University of Wuerzburg where small mesohyl discs (2 mm diameter, 200 µm thickness)  
180 were subjected to high pressure freezing (HPF) and freeze substitution. Samples were  
181 embedded in LR white and 100 nm ultrathin sections were cut using a Histo Jumbo Diamond  
182 Knife (Diatome AG, Biel, Switzerland) on a Leica EM UC7 ultramicrotome (Leica  
183 Microsystems, Wetzlar, Germany). The sections were placed on poly-L-lysine coated slides  
184 and subjected to fluorescence *in situ* hybridization with the *Chloroflexi* clade specific probes  
185 at 10% FA concentration (900 mM NaCl, 20 mM Tris/HCL pH 7.4, 0.01% sodium dodecyl  
186 sulphate, 20% dextran sulfate). All three class or clade specific probes were co-hybridized  
187 and fluorescence signals were detected using an Axio Observer.Z1 microscope equipped  
188 with AxioCam 506 and Zen 2 version 2.0.0.0 software (Carl Zeiss Microscopy GmbH,  
189 Göttingen, Germany). On the same sections that were used for fluorescence microscopy,  
190 SEM was carried out using a field emission scanning electron microscope JSM-7500F  
191 (JEOL, Japan) with LBE detector (for back scattered electron imaging at extremely low  
192 acceleration voltages) directly on the microscope slides. FISH and SEM images of same  
193 regions were computer-correlated based on sponge heterochromatin pattern as described in  
194 Jahn *et al.* (43).

195



196 *Functional genomic analysis*

197 Genomic data from single amplified genome sequences and the extracted metagenome bins  
198 were loaded and analyzed in IMG (<http://img.jgi.doe.gov/>) using the KEGG Orthology (KO)  
199 terms assigned to our data sets and metabolic pathways (KEGG) were analyzed. To identify  
200 CRISPR related genes, CRISPRfinder (<http://crispr.u-psud.fr/Server/>) was used. For the  
201 search of specific metabolite gene cluster, antiSMASH was used (44). The genomic potential  
202 of investigated microbial symbionts to degrade and transform complex carbohydrates was  
203 assessed by screening the IMG-predicted open reading frames (ORFs) of the genome data  
204 against the dbCAN (45) and classified according to the carbohydrate-active enzymes  
205 (CAZymes) database (46).

206

207 **Results and discussion**

208

209 *Chloroflexi abundance in HMA sponges*

210 Recently, members of the phylum *Chloroflexi* were shown to be present in much higher  
211 abundance and diversity in HMA sponges than in LMA sponges, which is why they were  
212 termed “indicator species” for HMA sponges (35). Here, we provide further details into the  
213 presence and abundance of *Chloroflexi* in sponges that were either classified or predicted by  
214 machine learning as HMA (35), (Figure 1, tables S2A and S2B). The recently compiled  
215 Sponge Microbiome Project (6, 32) was used as a reference database. In these 63  
216 investigated sponge species, *Chloroflexi* abundances ranged from 4.39 %  $\pm$  3.02 %  
217 (*Chondrilla caribensis*) to 31.89 %  $\pm$  5.27 % (*Aplysina* sp.), (Figure 1- right panel, suppl.  
218 Table 2A). With respect to the *Chloroflexi* classes, the SAR202 clade was the most  
219 abundant, contributing on average to 47.74%  $\pm$  22.00% of the phylum total abundance  
220 (Figure 1 - top panel, suppl. table 2B). Members of the classes Caldilineae (22.35 %  $\pm$   
221 17.93%) and Anaerolineae 11.64%  $\pm$  12.30% were also abundant. Unclassified OTUs at  
222 class level represented 14.50%  $\pm$  10.77% of *Chloroflexi* sequences indicating that there is  
223 phylogenetic novelty still to be discovered. Despite some variability (Figure 1, main panel),



224 the classes SAR202, Caldilineae and Anaerolineae as well as diverse hitherto unclassified  
225 OTUs dominated the *Chloroflexi* population in the HMA sponges. The remaining classes  
226 amounted to a total of 3.78% of total phylum abundance.

227

### 228 *Phylogeny of Chloroflexi metagenome bins and single amplified genomes (SAGs)*

229 16S rRNA gene sequencing of 260 single amplified genomes (SAGs) obtained from sponges  
230 resulted in the identification of 13 SAGs that belonged to the phylum *Chloroflexi*.  
231 Phylogenetic analysis of 16S rRNA genes revealed that one (3D), four (1B, 1G, 1H, 4H) and  
232 eight (2D, 3B, 3H, 4A, 5H, 6B, 6C, 6F) SAGs belonged to the classes SAR202, Anaerolineae  
233 and Caldilineae, respectively, forming a well-supported sequence cluster (bootstrap: 100)  
234 with other sponge derived sequences (Figure S1). The binning of metagenomic sequence  
235 data (21) resulted in an additional five high-quality bins (Table 1). The only metagenome bin  
236 containing a 16S rRNA gene (S156) belonged to SAR202. The SAR202 sequences formed a  
237 well-supported cluster (bootstrap value: 98) with other sponge derived 16S rRNA gene  
238 sequences (Figure S1). To elucidate the affiliation of the remaining four metagenome bins  
239 lacking 16S rRNA genes of appropriate length, a concatenated genome tree based on nine  
240 ribosomal genes was calculated (Figure 2A). One bin (A154) was affiliated to the class  
241 Anaerolineae, two metagenome bins were associated to the Caldilineae (C141 and C174),  
242 and two were associated to the SAR202 clade (S152 and S156) within the phylum  
243 *Chloroflexi*. The phylogenetic affiliation of metagenome bin S156 was congruent with the 16S  
244 rRNA gene analysis. SAGs were included in the protein based phylogenetic analysis when  
245 they encoded at least three of the nine ribosomal genes. Due to the lack of more complete  
246 reference genomes from SAR202 microorganisms, the most complete one (ca. 25%,  
247 SAR202 cluster bacterium sp. SCGC AAA240-N13, Gs0017605, (26) was included in this  
248 analysis although only one ribosomal protein could be used for tree construction. Both  
249 analyses showed a stable phylogeny of all SAGs and metagenome bins to above described  
250 classes or clades within the phylum *Chloroflexi*. All three classes/clades were visualized in  
251 the *A. aerophoba* sponge mesohyl matrix by fluorescence in situ co-hybridization (FISH) on

252 ultra-thin tissue sections using class/ clade-specific probes. *Chloroflexi* cell signal was  
253 abundant, especially for SAR202 and cells were metabolically active as judged by the  
254 brightness of the FISH probe (Figure 2B).

255

#### 256 *General description of genomes*

257 Final genome assembly sizes for the sponge associated *Chloroflexi* single cells (SAGs)  
258 ranged from 0.16 to 4.25 Mbp, representing up to 66.85 % of genome completeness derived  
259 from IMG based estimations (Table 1). Final genome assembly sizes for the metagenomic  
260 bins ranged from 3.3 - 6.3 Mbp, showing high estimated genome completeness between  
261 82.8 - 93.4% (Table 1). The guanine-cytosine (GC) content ranged from 58.08 to 59.32%,  
262 from 58.36 to 62.98% and from 56.93 to 65.59% for Anaerolineae, Caldilineae and SAR202,  
263 respectively. The number of identified genes was highly variable, ranging from 3,358 genes  
264 for Anaerolineae genome bin A154, to 5,448 for the SAR202 bin S152 and 5,662 genes for  
265 the Caldilineae bin C174 (Table 1). The five metagenome bins (two for Caldilineae (C141,  
266 C174), two for SAR202 (S152, S156) and one for Anaerolineae (A154)) which had > 90%  
267 coverage were chosen for detailed metabolic analysis and inner-phylum comparison. Due to  
268 the lack of marine reference genomes for Anaerolineae and Caldilineae or incompleteness of  
269 SAR202 reference genomes (26) we did not compare sponge derived *Chloroflexi* with these  
270 references. The letters of the bins were chosen to reflect their phylogenetic identity (“A”=  
271 Anaerolineae, “C”= Caldilineae, “S”= SAR202). A gene or enzyme is considered present  
272 when identified in both bins of the corresponding clade. Additionally, the most complete  
273 Anaerolineae SAG 1B (55.76% genome completeness estimation) was included in the  
274 analysis. For Anaerolineae, we consider an enzyme or gene present when identified in bin  
275 A154 and the SAG 1B was taken as additional support.

276

#### 277 *Central metabolism of sponge associated Chloroflexi*

278 Metabolic reconstruction suggests that *Chloroflexi* are aerobic and heterotrophic  
279 bacteria (see supporting text and supplementary figures for details). Genes involved in

280 glycolysis and the tricarboxylic acid cycle (TCA) were almost completely identified in all  
281 metagenome bins (Figure S2A, B). The pentose phosphate pathway (PPP), including the  
282 oxidative and non-oxidative phase is largely present. Also, the Entner-Doudoroff-pathway  
283 was identified, but lacks the gene encoding for enzyme phosphogluconate dehydratase (EC:  
284 4.2.1.12) in all clades. Furthermore, the enzyme 2-dehydro-3-deoxyphosphogluconate  
285 aldolase (EC: 4.2.1.14) is missing in SAR202 (Figure S2C). Interestingly, only the genomes  
286 of Anaerolineae and Caldilineae encode for enzymes involved in the ribulose  
287 monophosphate pathway (conversion of  $\beta$ -D-fructose-6P to D-ribulose-5P), which was  
288 originally found in methylotrophic bacteria but is now recognized as a widespread prokaryotic  
289 pathway involved in formaldehyde fixation and detoxification (47).

290 With respect to autotrophic carbon fixation, the reductive citrate acid cycle (Arnon-  
291 Buchanan cycle), is largely present, with the exception of ATP-citrate lyase (EC: 3.2.2.8),  
292 that is missing in all six genomes. A second pathway of autotrophic carbon fixation, the  
293 Wood-Ljungdahl-pathway was partially identified. While the genes encoding for carbon  
294 monoxide dehydrogenase (EC: 1.2.99.2) and formate dehydrogenase (EC: 1.2.1.43) are  
295 noticeably present in all six genomes, the rest of the Wood-Ljungdahl-pathway remains  
296 incomplete (see Figure S2D). Ammonia import and assimilation is encoded on all  
297 investigated genomes, but SAR202 and Caldilineae have additional genes for glutamate  
298 synthesis from glutamine and directly from ammonia. The transport of nitrite (and possibly  
299 also nitrate) is encoded on all investigated genomes while the reduction to ammonia is  
300 encoded only by SAR202 (Figure S2E). The incorporation of sulfur (with thiosulfate or few  
301 other sulfur compounds as donor) into S-containing amino acids might be possible in all  
302 clades whereas the assimilatory reduction of sulfate is restricted to Anaerolineae and  
303 Caldilineae genomes (Figure S2F).

304 Genes encoding for enzymes of the respiratory chain, including succinate  
305 dehydrogenase, cytochrome c oxidase, NADH dehydrogenase and an f-type ATPase, are  
306 largely represented on all genomes. These energy gaining processes additionally provide  
307 precursors for further metabolic pathways such as biosynthesis of purines and pyrimidines,

308 amino acids and co-factors, or structural compounds. Machinery for transcription and  
309 translation, purine and pyrimidine metabolism are largely present. Fatty acid (FA)  
310 biosynthesis and degradation pathways were detected in all six genomes. Genes involved in  
311 FA beta-oxidation were found almost completely (supporting text), but also the three key  
312 enzymes involved in the propionyl-CoA pathway for odd-length and methylated fatty acid  
313 degradation were found among the genomes. This includes propionyl-CoA carboxylase (EC:  
314 6.1.4.3) which was annotated in all six genomes, methylmalonyl-CoA epimerase (EC  
315 5.1.99.1), and methylmalonyl-CoA mutase (EC: 5.4.99.2) both of which were found in all  
316 genomes except in S152. All genomes encode a number of different ABC transporters to  
317 supplement for nutrition and cell growth related compounds (incl. oligopeptides, phosphate,  
318 L- and branched chain amino acids, minerals as iron (III) and molybdate, metal ions as zinc,  
319 manganese and iron (II)). Additionally, all six genomes largely encode enzymes needed for  
320 biosynthesis of most amino acids (see supporting text). We could not identify any of the  
321 typical phosphotransferase systems, as it was the case for Poribacteria described previously  
322 (19).

323 We found genomic potential for aromatic degradation in *Chloroflexi* genomes, but  
324 pathways remain incomplete (supporting text). Several genes encoding for phenylpropionate  
325 and cinnamate degradation, terephthalate degradation, catechol degradation, and xylene  
326 degradation were identified on *Chloroflexi* genomes. Also, genes encoding for enzymes  
327 involved in ring-cleavage by Baeyer-Villinger oxidation and beta oxidation as well as ring-  
328 hydroxylating dioxygenases and isomerases were identified which could be involved in  
329 degradation of aromatic compounds. This finding is interesting in the context that many  
330 sponge species contain secondary metabolites that serve as a defense strategy against  
331 predators and biofouling (48). On the sponge genus level, highest (20-30% relative to the  
332 total microbiome) and most consistent presence of *Chloroflexi* within a sponge genus were  
333 found in the sponge genera *Plakortis*, *Agelas* (with the exception of *A. dispar*), *Aplysina* and  
334 sister taxon *Aiolochoira*. Interestingly, all of which contain characteristic natural products with  
335 aromatic ring structures that serve as chemotaxonomic markers (plakortolides, oroidins,

336 bromo tyrosine alkaloids, respectively). It is therefore tempting to speculate that *Chloroflexi*  
337 and SAR202 presences and abundances are shaped, at least to some extent, by the natural  
338 products chemistry of their corresponding host sponges.

339 With respect to cell wall structure, the Anaerolineae and Caldilineae genomes encode  
340 the gene repertoire for peptidoglycan biosynthesis. The noticeable lack of peptidoglycan  
341 biosynthesis genes in the SAR202 genomes (supporting text) is consistent with previous  
342 analyses of three *Chloroflexi* genomes derived from uranium-contaminated aquifers (27).  
343 Synthesis pathways encoding for lipopolysaccharides or biosynthesis pathways for other  
344 glycan-based membranes could also not be annotated. The synthesis of an S-layer was  
345 proposed for SAR202 bacteria (26) as well as a member of GIF09 clade of *Chloroflexi* (27)  
346 but genes involved in sialic acid formation (N-Acetylneuraminic acid - Neu5Ac) in the amino  
347 and nucleotide sugar metabolism pathway are incomplete (supporting text). Nevertheless,  
348 the SAR202 bin S152 encodes a type 2-ABC transporter (NodJI) to export lipo-  
349 oligosaccharides. These compounds were shown to play a role in nodulation process in  
350 rhizobium bacteria (49), but their potential role for sponge-associated bacteria remains  
351 unclear. Additionally, consistent with previous observations (50) none of the six genomes  
352 encoded flagellar and chemotaxis genes.

353

354 *Metabolic specialization: extensive carbohydrate uptake and degradation in Anaerolineae*  
355 *and Caldilineae*

356 The following features are metabolic specialities of Anaerolineae and Caldilineae and appear  
357 missing in SAR202, unless otherwise mentioned (Figure 3). We found a remarkable number  
358 of ABC transporters for the import of diverse mono- (ribose/ xylose, inositol, glycerol-3P and  
359 rhamnose) and oligosaccharides (sorbitol, raffinose/ stachyose/ melibiose, maltose, N-  
360 acetylglucosamine, arabinosaccharide) into Anaerolineae and Caldilineae cells. The  
361 pentoses xylose and ribose can also be imported into bacterial cells. Xylose can be  
362 processed to xylulose which may enter the pentose phosphate cycle finally leading into  
363 glycolysis. Ribose can be converted in 5-phosphoribosyl 1-pyrophosphate (PRPP) which is

364 precursor for the biosynthesis of the amino acid histidine or it may fuel into purine and  
365 pyrimidine synthesis (supporting text). Both groups may also be able to import glycerol-3P  
366 which is a phosphoric ester of glycerol (a component of glycerophospholipids) which can be  
367 converted to fatty acids. Additionally, we found evidence for arabinose and rhamnose import  
368 and degradation; however annotation was incomplete (supporting text).

369         Arabinooligosaccharides (such as  $\alpha$ -L-arabinofuranosides,  $\alpha$ -L-arabinans,  
370 arabinoxylans, and arabinogalactans) result from degradation of plant-like cell material  
371 entering the sponge by filtration. These substances may be imported by the almost  
372 completely annotated AraNPQ and MsmX transporters and be utilized to L-arabian and L-  
373 arabinose by the enzyme  $\alpha$ -N-arabinofuranosidase (EC: 3.2.1.55, GH3). The enzyme L-  
374 arabinose isomerase (EC: 5.3.1.4, AraA) is present in all four genomes of Anaerolineae and  
375 Caldilineae and converts L-arabinose to L-ribulose which can further be converted by  
376 reactions of PPP to glucose-6P suitable for entering glycolysis. Additionally, other  
377 oligosaccharides such as stachyose, raffinose, melibiose, and galactose can be imported  
378 and used in central metabolism (figure 3, supporting text).

379         The utilization of myo-inositol as carbon source and possibly as a regulatory agent  
380 was hypothesized previously for sponge-associated *Ca. Poribacteria* (19). Similarly, sponge-  
381 associated Anaerolineae and Caldilineae encode the nearly complete inositol degradation  
382 pathway (supporting text). Myo-inositol is likely degraded to glyceraldehyde-3-phosphate and  
383 acetyl-CoA, which are further used in the central metabolism. Inositol phosphates are found  
384 as part of eukaryotic and archaeal cell wall components (51). Phosphorylated inositol is a  
385 precursor for several lipid molecules including sphingolipids, ceramides and  
386 glycosylphosphatidylinositol anchors (52), as well as many stress-protective solutes of  
387 eukaryotes (51) and might be part of the signal transduction in sponges (53). Therefore, the  
388 sponge itself or eukaryotic microorganisms can probably provide inositol as a carbon source  
389 or regulatory agent for the microbial symbionts.

390         Uronic acids are sugar acids that can be found in biopolymers of plants, animals and  
391 bacteria (54, 55) and are known to occur in glycosaminoglycans (GAGs). GAGs in sponges



392 are mainly composed of fucose, glucuronic acid (glucuronate), mannose, galactose, N-  
393 acetylglucosamine and sulfate (56–58). Enzymes involved in degradation of uronic acids  
394 were found in Anaerolineae and Caldilineae genomes. The possibility of galacturonate and  
395 glucuronate catabolism is supported by the conversion of 2-dehydro-3-deoxy-D-gluconate by  
396 enzymes glucuronate isomerase (EC: 5.3.1.12), tagaturonate reductase (EC: 1.1.1.58) and  
397 altronate hydrolase (EC: 4.2.1.7). Furthermore, the presence of genes encoding for  
398 oligogalacturonide lyase (EC: 4.2.2.6), 2-deoxy-D-gluconate 3-dehydrogenase (EC:  
399 1.1.1.125) and 2-dehydro-3-desoxy-D-glucokinase (EC: 2.7.1.45) supports possible 4(4- $\alpha$ -D-  
400 gluc-4-enuronosyl)-D-galacturonate degradation activity. The products could then enter the  
401 ED pathway via 2-dehydro-3-desoxyphosphogluconate aldolase (EC: 4.1.2.14). Uronic acid  
402 degradation could principally be connected to the inositol degradation pathway via D-  
403 galacturonate even though additional genome evidence, such as genes encoding for the  
404 enzyme inositol oxidase, (EC. 1.13.99.1) remain wanting (Figure 3, supporting text). A  
405 number of transporters for N-acetylglucosamine, digalacturonate, mannose and galactose  
406 (Figure 3, supporting text) were identified in Anaerolineae and Caldilineae genomes.  
407 Digalacturonate can be utilized by uronic acid degradation pathway (supporting text) and N-  
408 acetylglucosamine can be used directly in amino sugar and nucleotide sugar synthesis. The  
409 presence of uronic acid degradation pathways provides strong support that Anaerolineae and  
410 Caldilineae, similar to the previously described *Ca. Poribacteria* degrade glycosaminoglycan  
411 chains of proteoglycans, which are important components of the sponge host matrix (19). In  
412 that line, Anaerolineae and Caldilineae genomes were enriched in arylsulfatases A (Figure  
413 S3) which were discussed to be involved in metabolism of sulfated polysaccharides from  
414 the sponge extracellular matrix (19, 21) and the heterotrophic ability of symbionts to use  
415 sponge components for nutritional purposes.

416

417 *Expanded carbohydrate-active enzyme (CAZymes) repertoire in Caldilineae and Anaerolineae*

418 In order to search for CAZymes, we screened the *Chloroflexi* genome data against dbCAN  
419 (45) and classified the enzymes according to the CAZy database (46). Most *Chloroflexi* hits



420 were against glycosyl hydrolases (GH), glycosyl transferases (GT), and carbohydrate-binding  
421 modules (CBM). Consistent with the above described metabolic specializations, these  
422 enzyme classes were present in higher amounts in *Caldilineae* and *Anaerolineae* than in  
423 SAR202 (Figure S4). Altogether, 40 GH families were identified in all *Chloroflexi* genomes  
424 (Table S3). Glycosyl hydrolase family 109 was the most abundant family of GHs and was  
425 identified in all six genomes. GH109 family proteins are predicted as  $\alpha$ -N-  
426 acetylgalactosaminidases (EC: 3.2.1.49) with putative substrates such as glycolipids,  
427 glycopeptides and glycoproteins all of which are common constituents of sponge mesohyl as  
428 well as dissolved organic matter from seawater. The family GH74 is second most abundant  
429 and is also present in all six genomes. These appear to be xyloglucan-hydrolyzing enzymes,  
430 that act on  $\beta$ -1,4 linkages and might help degrade various oligo- and polysaccharides. The  
431 previously reported glycosylhydrolases GH33 and GH32 (19, 20) were third most abundant,  
432 but were restricted to *Caldilineae* bin C174. This enzyme family is annotated as sialidase  
433 (EC: 3.2.1.18), capable of hydrolysing glycosidic linkages of terminal sialic acid residues,  
434 which are present in sponge mesohyl (59). Altogether 17 glycosyl transferases were  
435 identified on *Chloroflexi* genomes, with families GT2, GT4, and GT83 being most abundant.  
436 Among the 11 CBM families identified on *Chloroflexi* genomes, with CBM50 as the most  
437 abundant, but restricted to *Caldilineae* and *Anaerolineae*. CMB50 modules, also known as  
438 LysM domains, attach to various GH enzymes which are involved in the cleavage of chitin or  
439 peptidoglycan. The numbers of carbohydrate-active enzymes on *Chloroflexi* symbiont  
440 genomes reflect their extensive potential to degrade complex carbohydrates as was reported  
441 previously for *Ca. Poribacteria* and the sponge associated unidentified lineage SAUL (19,  
442 20).

443

#### 444 *Metabolic specialization: co-factor biosynthesis in SAR202 genomes*

445 There is mounting evidence that vitamins and co-factors produced by diverse symbiont  
446 lineages could be beneficial to the sponge host (60–63). Parallel transcriptional activity  
447 profiling of the symbionts and the sponge showed that the symbionts had the capacity for

448 vitamin B biosynthesis whereas the host transcripts displayed capacity for vitamin catabolism  
449 (64). It is thus tempting to speculate that the sponges' nutrition is augmented by symbiont  
450 derived vitamins and cofactors. In the present study, at least two biosynthetic pathways for  
451 co-factor biosynthesis were identified on SAR202 genomes, which were absent in  
452 Anaerolineae and Caldilineae (Figure 4). Thiamine is an essential cofactor which is involved  
453 in central metabolism. The biosynthesis of the biologically active form thiamine diphosphate  
454 (TPP) from L-cysteine, glycine, pyruvate, and glyceraldehyde-3P is encoded on the SAR202  
455 genomes (Figures 3, 4A). Although the pathway is incomplete, the data strongly suggest that  
456 the synthesis of TPP is restricted to SAR202 bacteria. Instead, Anaerolineae and Caldilineae  
457 appear to import thiamine via a ABC transporter (TbpA, ThiPQ) and convert it to TPP by use  
458 of thiamine pyrophosphokinase (EC: 2.7.6.2).

459 Secondly, riboflavin (vitamin B2) is required by enzymes and proteins to perform  
460 specific physiological functions. Specifically, the active forms, flavin mononucleotide (FMN)  
461 and flavin adenine dinucleotide (FAD), serve as cofactors for a variety of flavoprotein enzyme  
462 reactions. Most genomes encode for the enzymes FMN adenylyltransferase (EC: 2.7.7.2)  
463 and FAD riboflavin kinase (EC: 2.7.1.26) which activate riboflavin into FMN. However, only  
464 the SAR202 genomes encode the riboflavin biosynthesis enzymes which rely on GTP and  
465 ribulose-5P (Figures 3, 4B). Both substrates can be provided by pathways of the central  
466 metabolism pathways (purine metabolism and PPP).

467

#### 468 *Potential for degradation of recalcitrant DOM in SAR202*

469 The possible participation of deep sea SAR202 bacteria in degradation of recalcitrant or  
470 refractory DOM was recently postulated by Landry et al (26). Even though the exact  
471 composition of DOM in the world's oceans remains to be elucidated, refractory DOM is an  
472 important component of the global carbon budget in terms of sheer mass. Landry *et al.* (26)  
473 argue that SAR202 genomes have an expanded repertoire of oxidative enzymes that may  
474 help in the oxidation of recalcitrant compounds. Interestingly, some of the major enzymes  
475 were also found to be enriched in SAR202 symbionts of sponges (Table S4). Among them

476 are genes encoding proteins from the CaiB/BaiF family as well as related family III  
477 transferases. While the enrichment of CaiB was previously interpreted as carnitine being a  
478 carbon and nitrogen source for sponge symbionts (21), an alternative explanation may be  
479 that it serves to funnel substrates into degradation pathways without consumption of energy  
480 by shuffling CoA, thus generating free electrons (supporting text). Even though the precise  
481 function of CaiB/BaiF family proteins cannot be elucidated at the present time, the  
482 enrichment in SAR202 genomes is noteworthy. Further, a total of 53 flavin-dependent, class  
483 C oxidoreductases of the luciferase family (Flavin mononucleotide monooxygenases,  
484 FMNOs, COG2141) which include alkanesulfonate monooxygenase SsuD and methylene  
485 tetrahydromethanopterin reductase, were present and enriched in SAR202 genomes. These  
486 enzymes are proposed to participate in the oxidation of (long-chain) aldehydes to carboxylic  
487 acids, and/ or in cleavage of carbon-sulfur bonds in a variety of sulfonated alkanes (65). The  
488 SAR202 genomes contained 22 genes encoding for short-chain alcohol dehydrogenases  
489 (COG0300) which might be involved in canalization of ketone body derivate release. Some of  
490 these genes from bin S152 showed homologies to cyclopentanol and 3- $\alpha$  (or 20- $\beta$ ) -  
491 hydroxysteroid dehydrogenases which convert alicyclic-bound alcohol groups to ketones (26,  
492 66). The combination of the enzymes described above could allow sponge associated  
493 *Chloroflexi* the conversion of recalcitrant alicyclic ring structure to more labile carboxylic acid,  
494 as proposed recently for SAR202 bacteria from deep sea (26).

495 Additionally, a number of oxidative enzymes was identified on the Chloroflexi  
496 genomes, but was not enriched in SAR202 (Table S4). These include a 2-  
497 oxoglutarate:ferredoxin oxidoreductase (EC: 1.2.7.11) which oxidizes acetyl-CoA, carbon  
498 monoxide dehydrogenase (EC: 1.2.99.2) which might endow the bacteria to oxidize CO<sub>2</sub> as  
499 described for some members of the Ktedonobacteria (67), CO- or xanthine dehydrogenases  
500 (COG1529) which are possibly involved in oxidation of a broad range of complex substrates  
501 (26), choline dehydrogenase (EC. 1.1.99.1) being possibly involved in the oxidation of  
502 alcohols to aldehydes, sarcosine oxidase (EC. 1.5.3.1), the serine hydroxymethyltransferase  
503 (2.1.2.1) with predicted function in choline degradation, formaldehyde dehydrogenase (EC:

504 1.2.1.46) and subunits of formate dehydrogenase (EC: 1.2.1.2/ 43) which oxidize  
505 formaldehyde and formate and might be involved in demethylation of various compounds.  
506 The overall presence and frequent enrichment of enzymes with oxidative capacity in SAR202  
507 would be consistent with gene functions in degradation of recalcitrant DOM. However, owing  
508 to the sponges' existence in shallow water sun-light benthic environments, it remains unclear  
509 whether the sponge symbionts encounter recalcitrant DOM derived from seawater sources.  
510 Alternatively, and similar to other high diversity microbiomes for example of ant, ruminant,  
511 and human guts (ref), the resident microbes are likely to specialize on certain substrates,  
512 thus promoting maximum nutrient exploitation and also securing their individual niche in the  
513 holobiont ecosystem.

514

#### 515 *Symbiosis related features*

516 Eukaryotic-like proteins (ELPs) seem to be a general genomic feature of sponge symbionts  
517 (20, 50, 60, 61, 68–70). Particularly ankyrin (ANK), tetratricopeptide (TPR), and leucine-rich  
518 (LRR) repeat proteins are postulated to be involved in mediating host-microbe interactions  
519 (71, 72). Ankyrin and ankyrin repeat containing proteins were detected in all six genomes  
520 (Figure S5, Table S5A). It was recently proposed that the expression of sponge symbiont  
521 derived ankyrin protein prevents phagocytosis by amoeba (73), and it is tempting to  
522 speculate that they protect the symbionts from digestion by the sponge archaeocytes in vivo.  
523 TPRs, possibly functioning as module for protein-protein interaction involved in a variety of  
524 cellular functions, including those that participate in bacterial pathogenesis (74) were found in  
525 all six genomes. However, LRRs were only identified in Caldilineae and SAR202 genomes  
526 (Figure S5, Table S5A). Many LRR proteins are involved in protein-ligand interactions; these  
527 include plant immune response and the mammalian innate immune response (for review see  
528 (75), such as the detection of pathogen-associated molecular patterns by recognition  
529 receptors (76). Our findings are in good agreement with general patterns previously found in  
530 metagenomes of sponge symbionts (50, 61), in enriched (mini)-metagenomes of

531 cyanobacterial sponge symbionts (69) and single amplified genomes from members of SAUL  
532 (20) and *Ca. Poribacteria* (68).

533 Another example of sponge-symbiont enriched features are the clustered, regularly  
534 interspaced, short, palindromic repeats (CRISPRs) and their associated proteins (Cas) that  
535 have recently been reported from the genomes of sponge symbionts (20, 50, 60, 61, 69).  
536 Here, the investigated *Caldilineae* genomes and the two SAR202 genomes showed an  
537 enrichment of CRISPR (Table 2). However, the two most complete *Anaerolineae* genomes  
538 did not contain any CRISPR-Cas systems. The presence CRISPRs can be explained the  
539 extensive filter feeding activity of sponge hosts that result in high exposure of sponge  
540 symbionts and phages and other sources of free DNA from ambient seawater.

541 The synthesis of secondary metabolites is an important defense mechanism of  
542 sessile microorganisms such as sponges to protect against predators or biofouling (48).  
543 Many of these compounds are in fact produced by the sponge microbiome (10, 48)  
544 Especially polyketide synthases (PKS), non-ribosomal peptide synthetases (NRPS), and  
545 halogenases are regularly enriched in sponge symbionts, often with new structures and  
546 putatively novel activities (38, 61, 77–81). Here, we assessed the genomic repertoire of  
547 sponge associated *Chloroflexi* for secondary metabolism using antiSMASH (44). In both  
548 SAR202 genomes and in *Caldilineae* C141 we found up to three polyketide synthase (PKS)  
549 gene clusters all of which showed homologies to the previously reported type I PKS gene  
550 cluster from other sponge symbionts. Additional gene clusters for the production of terpenes  
551 and other yet to be identified substances were identified in the two SAR202 genomes and in  
552 *Caldilineae* C174 (Table 2, Table S5B). Both *Anaerolineae* genomes did not contain any  
553 gene clusters for the biosynthesis of secondary metabolites. While the exact functions of  
554 these gene clusters putatively involved in defense remain unknown, it appears that at least  
555 SAR202 bacteria and *Caldilineae* have the genomic repertoire for chemical defense within  
556 the sponge holobiont.

557

558 *Ultrastructural identification of sponge specific Chloroflexi*

559           The correlation of probe specific fluorescence with scanning electron microscopy  
560 images (SEM) allowed the taxon-specific identification of *Chloroflexi* cells at ultrastructural  
561 resolution. Overall, distributions of all three *Chloroflexi* clades in *Aplysina aerophoba* indicate  
562 that SAR202 cells were more abundant than the other two *Chloroflexi* classes (Figure 5).  
563 This is consistent with the relative abundances of *Chloroflexi* classes in HMA sponges  
564 extracted from EMP data (Figure 1). Cells belonging to the SAR 202 clade (green signals in  
565 Fig. 5A and 5B) are generally rod shaped (0.8 x 1-2  $\mu\text{m}$ ) with a regular distribution of cell  
566 cytosol content. The Anaerolineae-specific probe targeted rod shaped cells (0.8 x 2.0 $\mu\text{m}$ )  
567 (red signal, Figure 5A). The characteristic feature of Caldilineae positive cells (ca. 1 x 2  $\mu\text{m}$ )  
568 was the presence of electron dense capsules or mucus-like structures located at the cell  
569 poles (orange signal, Fig. 5B). All cells which were stained positive with a corresponding  
570 FISH probe showed a consistent morphology, which was taken as a measure of probe  
571 specificity.

572

### 573 *Conclusions*

574 Owing to the lack of cultivation and difficult experimental access for the majority of  
575 *Chloroflexi* clades, advancing knowledge has been limited to few lineages (26, 27, 31). The  
576 present study provides a new experimental opportunity as HMA sponges were identified as  
577 true *Chloroflexi* hotspots, both in terms of biomass and biodiversity. Meta- and single cell  
578 genomic analyses revealed metabolic specialization in that Anaerolineae and Caldilineae  
579 have an expanded gene repertoire for carbohydrate degradation while SAR202 specializes  
580 on amino acids. Similarly, while Anaerolineae/ Caldilineae take up cofactors, SAR202 has  
581 the genomic repertoire for their synthesis. A combination of FISH-CLEM allowed, for the first  
582 time, to visualize *Chloroflexi* in the host context and to identify characteristic cellular  
583 morphotypes. The results of this study suggest that *Chloroflexi* symbionts have the genomic  
584 potential for DOM degradation from seawater, both labile and recalcitrant. These findings are  
585 in line with previous reports that have shown extensive carbohydrate degradation potential in  
586 other HMA sponge symbionts (10, 19, 20). Thus, we hypothesize that collectively sponge

587 microbes not only provide nutrients to the HMA sponge host, but also contribute to DOM  
588 cycling and primary productivity in reef ecosystems via a pathway termed the “sponge loop”.  
589 Considering the abundance and dominance of sponges in many benthic environments, we  
590 predict that role of sponge symbionts in biogeochemical cycles is larger than previously  
591 thought.

592

### 593 **Acknowledgements**

594 We gratefully acknowledge financial support from the DFG (CRC1182-TPB1) and from the  
595 European Union’s Horizon 2020 research and innovation program under Grant Agreement  
596 No. 679849 (‘SponGES’). B.M.S. and M.T.J. were supported by grants of the German  
597 Excellence Initiative to the Graduate School of Life Sciences, University of Wuerzburg. We  
598 thank Laura Rix and Lucia Pita Galan for many insightful discussions on sponge ecology and  
599 Christian Stigloher at University of Wuerzburg for support in FISH-CLEM.

600

601

602

603

604

605

606

607

608

609

610

611

612

613

614



615 **Figure legend**

616 Table 1: Genomic features overview of single amplified genomes (SAGs) and metagenome  
617 bins of *A. aerophoba* associated *Chloroflexi* and closest relative reference genomes  
618 analyzed in this study.

619  
620 Table 2: Genomic characteristics of the six genomes investigated in detail. The absolute  
621 numbers of CRISPR arrays – defined by CRISPRfinder and IMG, the number of Ankyrin  
622 repeat containing Proteins (ANK), as well as the number of secondary metabolite  
623 (antiSMASH) gene cluster per genome are shown.

624  
625 Figure 1: Relative abundance of *Chloroflexi* classes in HMA sponges extracted from Earth  
626 Microbiome Project (EMP) data (6). The central panel shows the mean relative abundance of  
627 *Chloroflexi* classes per sponge species. Top panel shows mean relative abundance of  
628 *Chloroflexi* classes in all HMA sponges. Right panel displays the mean relative abundance of  
629 whole phylum *Chloroflexi* in HMA sponges (predicted and classified).

630  
631 Figure 2A: Concatenated protein tree. Maximum Likelihood phylogenetic analysis of  
632 *Chloroflexi* metagenome bins and SAGs (in red) derived from 1914 positions of 60  
633 sequences. The percentage of replicate trees in which the associated taxa clustered together  
634 in the bootstrap test (100 replicates) are shown as symbols (biggest closed circles bs 100,  
635 symbol size represent values from 75 and above). Initial tree for the heuristic search were  
636 obtained automatically by applying Neighbor-Joining and BioNJ algorithms to a matrix of  
637 pairwise distances estimated using a JTT model.

638  
639 Figure 2B: Distribution of *Chloroflexi* clades in *Aplysina aerophoba* mesohyl using  
640 fluorescence *in situ* hybridization (FISH): The picture show the overlay of all probes, SAR202  
641 cells are displayed in green, Caldilineae cells in orange, Anaerolineae cells in red. The

642 nucleotide stain DAPI (white/ grey) served as reference for the localization of unstained cells.

643 Scale bar: 10  $\mu$ m.

644

645 Figure 3: Reconstruction of class-specific metabolic features. On the left side (blueish color)  
646 the transporter and utilization pathways found mainly in Anaerolineae and Caldilineae  
647 genomes are summarized. SAR202-specific transporter and pathways (for co-factor  
648 biosynthesis) are displayed on the right (reddish color). Common genomic features  
649 (glycolysis, amino acid metabolism and transport, fatty acid metabolism, respiratory chain  
650 etc.) are not shown.

651

652 Figure 4: Metabolic specialization in SAR202: Biosynthesis pathways of co-factors thiamine  
653 (A) and riboflavin (B) in SAR202 genomes.

654

655 Figure 5: Visualization of sponge-associated *Chloroflexi* in *Aplysina aerophoba* mesohyl  
656 using FISH-CLEM technique: SAR202 cells are displayed in green (panel A and B)  
657 Caldilineae in orange (panel B) Anaerolineae in red (panel A). The nucleotide stain DAPI  
658 (blue) served as reference for the localization of unstained cells. In both panels the right  
659 picture is the overlay of all probes. Scale bars: 1  $\mu$ m.

660

661 Supplemental tables

662 Supplemental figures

663 Supporting text

664

665

666

667

668

669

670 **Literature:**

- 671 1. Li CW, Chen JY, Hua TE. 1998. Precambrian sponges with cellular structures.  
672 *Science* (80- ) 279:879–882.
- 673 2. Yin Z, Zhu M, Davidson EH, Bottjer DJ, Zhao F, Tafforeau P. 2015. Sponge grade  
674 body fossil with cellular resolution dating 60 Myr before the Cambrian. *Proc Natl Acad*  
675 *Sci* 201414577.
- 676 3. Van Soest RWM, Boury-Esnault N, Vacelet J, Dohrmann M, Erpenbeck D, De Voogd  
677 NJ, Santodomingo N, Vanhoorne B, Kelly M, Hooper JNA. 2012. Global Diversity of  
678 Sponges (Porifera). *PLoS One* 7:e35105.
- 679 4. Bell JJ. 2008. The functional roles of marine sponges. *Estuar Coast Shelf Sci* 79:341–  
680 353.
- 681 5. Maldonado M, Ribes M, van Duyl FC. 2012. Nutrient Fluxes Through Sponges.  
682 *Biology, Budgets, and Ecological Implications Advances in Marine Biology*, 1st ed.  
683 Elsevier Ltd.
- 684 6. Thomas T, Moitinho-Silva L, Lurgi M, Björk JR, Easson C, Astudillo-García C, Olson  
685 JB, Erwin PM, López-Legentil S, Luter H, Chaves-Fonnegra A, Costa R, Schupp PJ,  
686 Steindler L, Erpenbeck D, Gilbert J, Knight R, Ackermann G, Victor Lopez J, Taylor  
687 MW, Thacker RW, Montoya JM, Hentschel U, Webster NS. 2016. Diversity, structure  
688 and convergent evolution of the global sponge microbiome. *Nat Commun* 7.
- 689 7. McMurray S, Stubler A, Erwin P, Finelli C, Pawlik J. 2018. A test of the sponge-loop  
690 hypothesis for emergent Caribbean reef sponges. *Mar Ecol Prog Ser* 588:1–14.
- 691 8. Blunt JW, Copp BR, Keyzers RA, Munro MHG, Prinsep MR. 2017. Marine natural  
692 products. *Nat Prod Rep* 34:235–294.
- 693 9. Wilson MC, Mori T, Rückert C, Uria AR, Helf MJ, Takada K, Gernert C, Steffens UAE,  
694 Heycke N, Schmitt S, Rinke C, Helfrich EJM, Brachmann AO, Gurgui C, Wakimoto T,  
695 Kracht M, Crüsemann M, Hentschel U, Abe I, Matsunaga S, Kalinowski J, Takeyama  
696 H, Piel J. 2014. An environmental bacterial taxon with a large and distinct metabolic  
697 repertoire. *Nature* 506:58–62.

- 698 10. Lackner G, Peters EE, Helfrich EJM, Piel J. 2017. Insights into the lifestyle of  
699 uncultured bacterial natural product factories associated with marine sponges. *Proc*  
700 *Natl Acad Sci* 114:E347–E356.
- 701 11. Hentschel U, Usher KM, Taylor MW. 2006. Marine sponges as microbial fermenters.  
702 *FEMS Microbiol Ecol* 55:167–177.
- 703 12. Moitinho-Silva L, Steinert G, Nielsen S, Hardoim CCP, Wu YC, McCormack GP,  
704 López-Legentil S, Marchant R, Webster N, Thomas T, Hentschel U. 2017. Predicting  
705 the HMA-LMA status in marine sponges by machine learning. *Front Microbiol* 8:1–14.
- 706 13. Pita L, Rix L, Slaby BM, Franke A, Hentschel U. 2018. The sponge holobiont in a  
707 changing ocean: from microbes to ecosystems. *Microbiome* 6:46.
- 708 14. Bayer K, Moitinho-Silva L, Brümmer F, Cannistraci C V., Ravasi T, Hentschel U. 2014.  
709 GeoChip-based insights into the microbial functional gene repertoire of marine  
710 sponges (high microbial abundance, low microbial abundance) and seawater. *FEMS*  
711 *Microbiol Ecol* 90:832–843.
- 712 15. Weisz JB, Lindquist N, Martens CS. 2008. Do associated microbial abundances  
713 impact marine demosponge pumping rates and tissue densities? *Oecologia* 155:367–  
714 376.
- 715 16. Ribes M, Jiménez E, Yahel G, López-Sendino P, Diez B, Massana R, Sharp JH,  
716 Coma R. 2012. Functional convergence of microbes associated with temperate marine  
717 sponges. *Environ Microbiol* 14:1224–1239.
- 718 17. Hoer DR, Gibson PJ, Tommerdahl JP, Lindquist NL, Martens CS. 2018. Consumption  
719 of dissolved organic carbon by Caribbean reef sponges. *Limnol Oceanogr* 63:337–  
720 351.
- 721 18. Maldonado M. 2016. Sponge waste that fuels marine oligotrophic food webs: a re-  
722 assessment of its origin and nature. *Mar Ecol* 37:477–491.
- 723 19. Kamke J, Sczyrba A, Ivanova N, Schwientek P, Rinke C, Mavromatis K, Woyke T,  
724 Hentschel U. 2013. Single-cell genomics reveals complex carbohydrate degradation  
725 patterns in poribacterial symbionts of marine sponges. *ISME J* 7:2287–2300.

- 726 20. Astudillo-García C, Slaby BM, Waite DW, Bayer K, Hentschel U, Taylor MW. 2017.  
727 Phylogeny and genomics of SAUL, an enigmatic bacterial lineage frequently  
728 associated with marine sponges. *Environ Microbiol* 00.
- 729 21. Slaby BM, Hackl T, Horn H, Bayer K, Hentschel U. 2017. Metagenomic binning of a  
730 marine sponge microbiome reveals unity in defense but metabolic specialization.  
731 *ISME J* 11:2465–2478.
- 732 22. Woese CR. 1988. Bacterial evolution. *Can J Microbiol* 34:547–551.
- 733 23. Hugenholtz P, Goebel BM, Pace NR. 1998. Impact of culture independent studies on  
734 the emerging phylogenetic view of bacterial diversity. *J Bacteriol* v:180p4765-4774.
- 735 24. Gupta RS, Chander P, George S. 2013. Phylogenetic framework and molecular  
736 signatures for the class Chloroflexi and its different clades; proposal for division of the  
737 class Chloroflexi class. nov. into the suborder Chloroflexineae subord. nov., consisting  
738 of the emended family Oscillochlorida. *Antonie Van Leeuwenhoek* 103:99–119.
- 739 25. Garrity G HJ. 2001. *Bergey's Manual of Systematic Bacteriology*. Springer New York,  
740 New York, NY.
- 741 26. Landry Z, Swa BK, Herndl GJ, Stepanauskas R, Giovannoni SJ. 2017. SAR202  
742 genomes from the dark ocean predict pathways for the oxidation of recalcitrant  
743 dissolved organic matter. *MBio* 8:1–19.
- 744 27. Hug LA, Castelle CJ, Wrighton KC, Thomas BC, Sharon I, Frischkorn KR, Williams  
745 KH, Tringe SG, Banfield JF. 2013. Community genomic analyses constrain the  
746 distribution of metabolic traits across the Chloroflexi phylum and indicate roles in  
747 sediment carbon cycling. *Microbiome* 1:1–17.
- 748 28. Campbell AG, Schwientek P, Vishnivetskaya T, Woyke T, Levy S, Beall CJ, Griffen A,  
749 Leys E, Podar M. 2014. Diversity and genomic insights into the uncultured Chloroflexi  
750 from the human microbiota. *Environ Microbiol* 16:2635–2643.
- 751 29. Edmonds-Wilson SL, Nurinova NI, Zapka CA, Fierer N, Wilson M. 2015. Review of  
752 human hand microbiome research. *J Dermatol Sci* 80:3–12.
- 753 30. Yamada T, Sekiguchi Y. 2009. Cultivation of Uncultured Chloroflexi Subphyla:

- 754 Significance and Ecophysiology of Formerly Uncultured Chloroflexi “Subphylum I” with  
755 Natural and Biotechnological Relevance. *Microbes Environ* 24:205–216.
- 756 31. Mehrshad M, Rodriguez-Valera F, Amoozegar MA, López-García P, Ghai R. 2017.  
757 The enigmatic SAR202 cluster up close: shedding light on a globally distributed dark  
758 ocean lineage involved in sulfur cycling. *ISME J* 1–14.
- 759 32. Moitinho-Silva L, Nielsen S, Amir A, Gonzalez A, Ackermann GL, Cerrano C, Astudillo-  
760 Garcia C, Easson C, Sipkema D, Liu F, Steinert G, Kotoulas G, McCormack GP, Feng  
761 G, Bell JJ, Vicente J, Björk JR, Montoya JM, Olson JB, Reveillaud J, Steindler L,  
762 Pineda MC, Marra M V., Ilan M, Taylor MW, Polymenakou P, Erwin PM, Schupp PJ,  
763 Simister RL, Knight R, Thacker RW, Costa R, Hill RT, Lopez-Legentil S, Dailianis T,  
764 Ravasi T, Hentschel U, Li Z, Webster NS, Thomas T. 2017. The sponge microbiome  
765 project. *Gigascience* 6:1–7.
- 766 33. Fieseler L, Horn M, Wagner M, Hentschel U. 2004. Discovery of the novel candidate  
767 phylum “Poribacteria” in marine sponges.
- 768 34. Bayer K, Kamke J, Hentschel U. 2014. Quantification of bacterial and archaeal  
769 symbionts in high and low microbial abundance sponges using real-time PCR. *FEMS*  
770 *Microbiol Ecol* 89:679–690.
- 771 35. Moitinho-Silva L, Steinert G, Nielsen S, Haroim CCP, Wu Y-C, McCormack GP,  
772 López-Legentil S, Marchant R, Webster N, Thomas T, Hentschel U. 2017. Predicting  
773 the HMA-LMA Status in Marine Sponges by Machine Learning. *Front Microbiol* 8.
- 774 36. Yilmaz P, Parfrey LW, Yarza P, Gerken J, Priesse E, Quast C, Schweer T, Peplies J,  
775 Ludwig W, Glöckner FO. 2014. The SILVA and “All-species Living Tree Project (LTP)”  
776 taxonomic frameworks. *Nucleic Acids Res* 42:D643–D648.
- 777 37. Rebecca Barter, Yu B. 2017. A Graphical Tool for Exploring Complex Datasets Using  
778 Heatmaps.
- 779 38. Bayer K, Scheuermayer M, Fieseler L, Hentschel U. 2013. Genomic Mining for Novel  
780 FADH<sub>2</sub>-Dependent Halogenases in Marine Sponge-Associated Microbial Consortia.  
781 *Mar Biotechnol* 15:63–72.

- 782 39. Pruesse E, Peplies J, Glöckner FO. 2012. SINA: Accurate high-throughput multiple  
783 sequence alignment of ribosomal RNA genes. *Bioinformatics* 28:1823–1829.
- 784 40. Kumar S, Stecher G, Tamura K. 2016. MEGA7: Molecular Evolutionary Genetics  
785 Analysis Version 7.0 for Bigger Datasets. *Mol Biol Evol* 33:1870–1874.
- 786 41. Ludwig W. 2004. ARB: a software environment for sequence data. *Nucleic Acids Res*  
787 32:1363–1371.
- 788 42. Morris RM, Rappé MS, Urbach E, Connon S a, Rappe MS. 2004. Prevalence of the  
789 Chloroflexi -Related SAR202 Bacterioplankton Cluster throughout the Mesopelagic  
790 Zone and Deep Ocean Prevalence of the Chloroflexi -Related SAR202  
791 Bacterioplankton Cluster throughout the Mesopelagic Zone and Deep Ocean †. *Appl*  
792 *Environ Microbiol* 70:2836–2842.
- 793 43. Jahn MT, Markert SM, Ryu T, Ravasi T, Stigloher C, Hentschel U, Moitinho-Silva L.  
794 2016. Shedding light on cell compartmentation in the candidate phylum Poribacteria  
795 by high resolution visualisation and transcriptional profiling. *Sci Rep* 6.
- 796 44. Weber T, Blin K, Duddela S, Krug D, Kim HU, Bruccoleri R, Lee SY, Fischbach MA,  
797 Müller R, Wohlleben W, Breitling R, Takano E, Medema MH. 2015. antiSMASH 3.0—a  
798 comprehensive resource for the genome mining of biosynthetic gene clusters. *Nucleic*  
799 *Acids Res* 43:W237–W243.
- 800 45. Yin Y, Mao X, Yang J, Chen X, Mao F, Xu Y. 2012. dbCAN: a web resource for  
801 automated carbohydrate-active enzyme annotation. *Nucleic Acids Res* 40:W445–  
802 W451.
- 803 46. Lombard V, Golaconda Ramulu H, Drula E, Coutinho PM, Henrissat B. 2014. The  
804 carbohydrate-active enzymes database (CAZy) in 2013. *Nucleic Acids Res* 42:490–  
805 495.
- 806 47. Orita I, Sato T, Yurimoto H, Kato N, Atomi H, Imanaka T, Sakai Y. 2006. The ribulose  
807 monophosphate pathway substitutes for the missing pentose phosphate pathway in  
808 the archaeon *Thermococcus kodakaraensis*. *J Bacteriol* 188:4698–4704.
- 809 48. Pawlik JR. 2011. *The Chemical Ecology of Sponges on Caribbean Reefs: Natural*



- 810 Products Shape Natural Systems. *Bioscience* 61:888–898.
- 811 49. Spaink HP, Wijffjes AHM, Lugtenberg BJJ. 1995. Rhizobium nodJ and NodJ proteins  
812 play a role in the efficiency of secretion of lipochitin oligosaccharides. *J Bacteriol*  
813 177:6276–6281.
- 814 50. Horn H, Slaby BM, Jahn MT, Bayer K, Moitinho-Silva L, Förster F, Abdelmohsen UR,  
815 Hentschel U. 2016. An Enrichment of CRISPR and other defense-related features in  
816 marine sponge-associated microbial metagenomes. *Front Microbiol* 7.
- 817 51. Michell RH. 2011. Inositol and its derivatives: Their evolution and functions. *Adv*  
818 *Enzyme Regul* 51:84–90.
- 819 52. Reynolds TB. 2009. Strategies for acquiring the phospholipid metabolite inositol in  
820 pathogenic bacteria, fungi and protozoa: making it and taking it. *Microbiology*  
821 155:1386–1396.
- 822 53. Müller WE, Rottmann M, Diehl-Seifert B, Kurelec B, Uhlenbruck G, Schröder HC.  
823 1987. Role of the aggregation factor in the regulation of phosphoinositide metabolism  
824 in sponges. Possible consequences on calcium efflux and on mitogenesis. *J Biol*  
825 *Chem* 262:9850–9858.
- 826 54. Sutherland IW. 1985. Biosynthesis and Composition of Gram-Negative Bacterial  
827 Extracellular and Wall Polysaccharides. *Annu Rev Microbiol* 39:243–270.
- 828 55. Rehm BHA. 2010. Bacterial polymers: biosynthesis, modifications and applications.  
829 *Nat Rev Microbiol* 8:578–592.
- 830 56. Misevic GN, Burger MM. 1986. Reconstitution of high cell binding affinity of a marine  
831 sponge aggregation factor by cross-linking of small low affinity fragments into a large  
832 polyvalent polymer. *J Biol Chem* 261:2853–2859.
- 833 57. Misevic GN, Burger MM. 1993. Carbohydrate-carbohydrate interactions of a novel  
834 acidic glycan can mediate sponge cell adhesion. *J Biol Chem* 268:4922–4929.
- 835 58. Misevic GN, Finne J, Burger MM. 1987. Involvement of carbohydrates as multiple low  
836 affinity interaction sites in the self-association of the aggregation factor from the  
837 marine sponge *Microciona prolifera*. *J Biol Chem* 262:5870–5877.

- 838 59. Garrone R, Thiney Y, Pavans de Ceccatty M. 1971. Electron microscopy of a  
839 mucopolysaccharide cell coat in sponges. *Experientia* 27:1324–1326.
- 840 60. Thomas T, Rusch D, DeMaere MZ, Yung PY, Lewis M, Halpern A, Heidelberg KB,  
841 Egan S, Steinberg PD, Kjelleberg S. 2010. Functional genomic signatures of sponge  
842 bacteria reveal unique and shared features of symbiosis. *ISME J* 4:1557–1567.
- 843 61. Fan L, Reynolds D, Liu M, Stark M, Kjelleberg S, Webster NS, Thomas T. 2012.  
844 Functional equivalence and evolutionary convergence in complex communities of  
845 microbial sponge symbionts. *Proc Natl Acad Sci* 109:E1878–E1887.
- 846 62. Hentschel U, Piel J, Degnan SM, Taylor MW. 2012. Genomic insights into the marine  
847 sponge microbiome. *Nat Rev Microbiol* 10:641–654.
- 848 63. Radax R, Hoffmann F, Rapp HT, Leininger S, Schleper C. 2012. Ammonia-oxidizing  
849 archaea as main drivers of nitrification in cold-water sponges. *Environ Microbiol*  
850 14:909–923.
- 851 64. Fiore CL, Labrie M, Jarett JK, Lesser MP. 2015. Transcriptional activity of the giant  
852 barrel sponge, *Xestospongia muta* Holobiont: molecular evidence for metabolic  
853 interchange. *Front Microbiol* 6.
- 854 65. Eichhorn E, Van Der Ploeg JR, Leisinger T. 1999. Characterization of a two-  
855 component alkanesulfonate monooxygenase from *Escherichia coli*. *J Biol Chem*  
856 274:26639–26646.
- 857 66. Griffin M, Trudgill PW. 1972. The metabolism of cyclopentanol by *Pseudomonas*  
858 *N.C.I.B. 9872*. *Biochem J* 129:595–603.
- 859 67. King CE, King GM. 2014. Description of *Thermogemmatispora carboxidivorans* sp.  
860 nov., a carbon-monoxideoxidizing member of the class Ktedonobacteria isolated from  
861 a geothermally heated biofilm, and analysis of carbon monoxide oxidation by members  
862 of the class Ktedonobacteria. *Int J Syst Evol Microbiol* 64:1244–1251.
- 863 68. Kamke J, Rinke C, Schwientek P, Mavromatis K, Ivanova N, Sczyrba A, Woyke T,  
864 Hentschel U. 2014. The candidate phylum Poribacteria by single-cell genomics: New  
865 insights into phylogeny, cell-compartmentation, eukaryote-like repeat proteins, and

- 866 other genomic features. PLoS One 9.
- 867 69. Burgsdorf I, Slaby BM, Handley KM, Haber M, Blom J, Marshall CW, Gilbert JA,  
868 Hentschel U, Steindler L. 2015. Lifestyle Evolution in Cyanobacterial Symbionts of  
869 Sponges. MBio 6:e00391-15.
- 870 70. Liu M, Fan L, Zhong L, Kjelleberg S, Thomas T. 2012. Metaproteogenomic analysis of  
871 a community of sponge symbionts. ISME J 6:1515–1525.
- 872 71. Díez-Vives C, Moitinho-Silva L, Nielsen S, Reynolds D, Thomas T. 2017. Expression  
873 of eukaryotic-like protein in the microbiome of sponges. Mol Ecol 26:1432–1451.
- 874 72. Reynolds D, Thomas T. 2016. Evolution and function of eukaryotic-like proteins from  
875 sponge symbionts. Mol Ecol 25:5242–5253.
- 876 73. Nguyen MTHD, Liu M, Thomas T. 2014. Ankyrin-repeat proteins from sponge  
877 symbionts modulate amoebal phagocytosis. Mol Ecol 23:1635–1645.
- 878 74. Cerveny L, Straskova A, Dankova V, Hartlova A, Ceckova M, Staud F, Stulik J. 2013.  
879 Tetratricopeptide Repeat Motifs in the World of Bacterial Pathogens: Role in Virulence  
880 Mechanisms. Infect Immun 81:629–635.
- 881 75. Matsushima N, Enkhbayar P, Kamiya M, Osaki M, Kretsinger R. 2005. Leucine-Rich  
882 Repeats (LRRs): Structure, Function, Evolution and Interaction with Ligands. Drug  
883 Des Rev - Online 2:305–322.
- 884 76. Ng ACY, Eisenberg JM, Heath RJW, Huett A, Robinson CM, Nau GJ, Xavier RJ.  
885 2011. Human leucine-rich repeat proteins: a genome-wide bioinformatic categorization  
886 and functional analysis in innate immunity. Proc Natl Acad Sci 108:4631–4638.
- 887 77. Hooper JA, Van Soest RM. 2002. Systema Porifera: A Guide to the Classification of  
888 Sponges. Springer US, Boston, MA.
- 889 78. Taylor MW, Radax R, Steger D, Wagner M. 2007. Sponge-Associated  
890 Microorganisms: Evolution, Ecology, and Biotechnological Potential. Microbiol Mol Biol  
891 Rev 71:295–347.
- 892 79. Siegl A, Hentschel U. 2010. PKS and NRPS gene clusters from microbial symbiont  
893 cells of marine sponges by whole genome amplification. Environ Microbiol Rep 2:507–

- 894 513.
- 895 80. Pimentel-Elardo SM, Grozdanov L, Proksch S, Hentschel U. 2012. Diversity of  
896 Nonribosomal Peptide Synthetase Genes in the Microbial Metagenomes of Marine  
897 Sponges. *Mar Drugs* 10:1192–1202.
- 898 81. Rua CPJ, de Oliveira LS, Froes A, Tschoeke DA, Soares AC, Leomil L, Gregoracci  
899 GB, Coutinho R, Hajdu E, Thompson CC, Berlinck RGS, Thompson FL. 2018.  
900 Microbial and Functional Biodiversity Patterns in Sponges that Accumulate  
901 Bromopyrrole Alkaloids Suggest Horizontal Gene Transfer of Halogenase Genes.  
902 *Microb Ecol.*
- 903
- 904

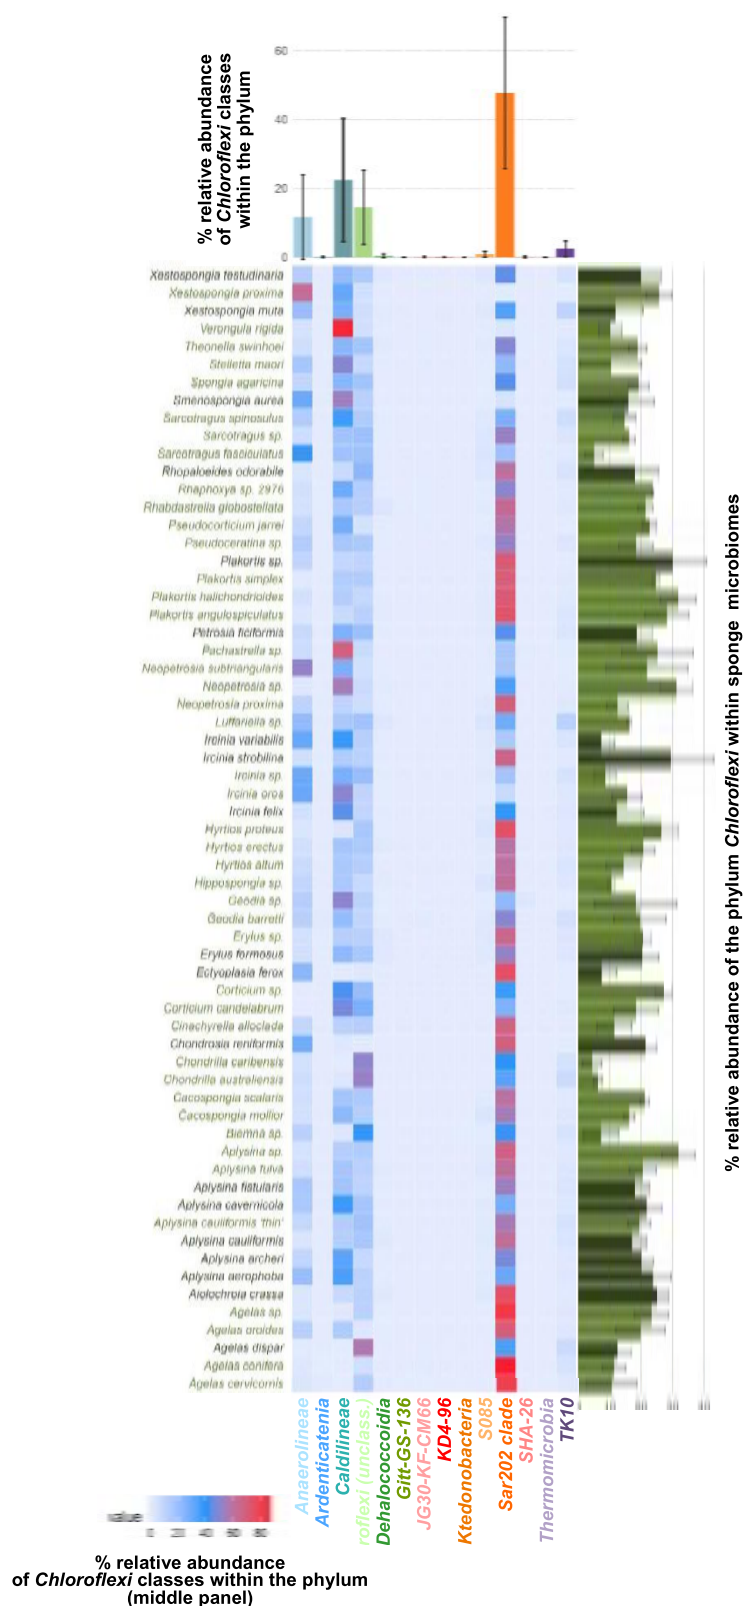

Figure 1: Relative abundance of *Chloroflexi* classes in HMA sponges extracted from Earth Microbiome Project (EMP) data (32). The central panel shows the mean relative abundance of classes per sponge species. Top panel shows mean relative abundance of *Chloroflexi* classes in all HMA sponges ( $\pm$  standard deviation). Right panel displays the mean relative abundance of the phylum *Chloroflexi* in predicted (light green bars) and classified (dark green bars) HMA sponges ( $\pm$  standard deviation).

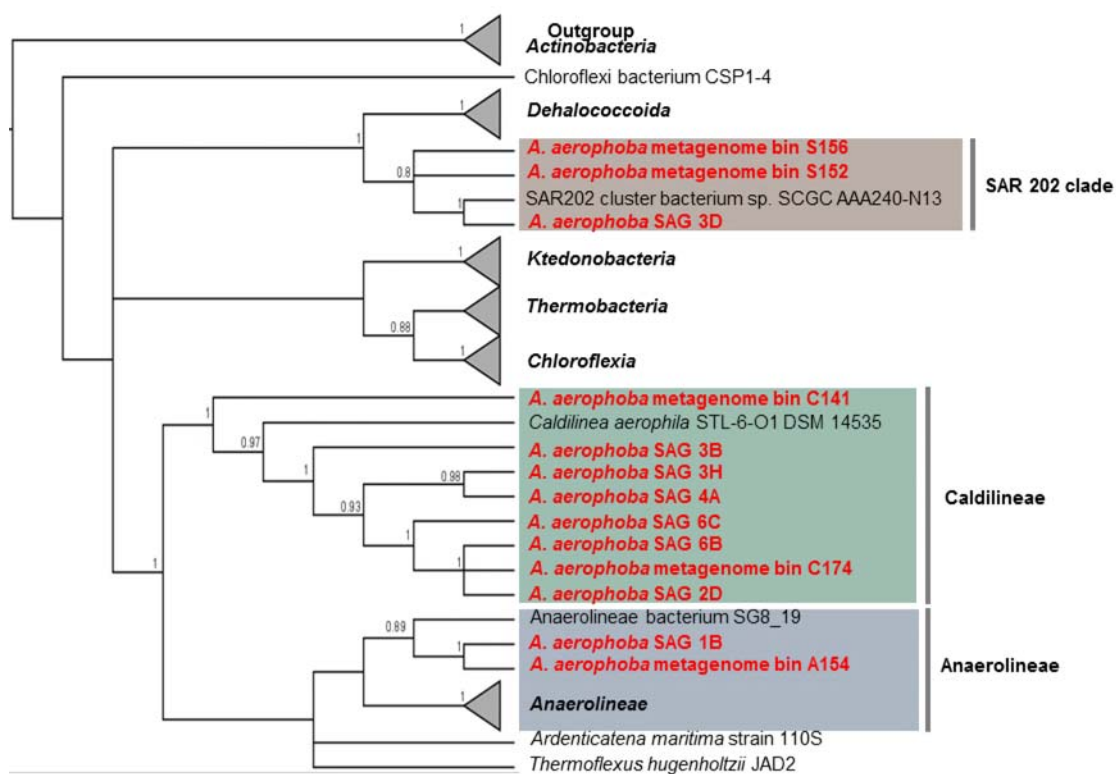

Figure 2A: Concatenated protein tree. Maximum Likelihood phylogenetic analysis of *Chloroflexi* metagenome bins and SAGs (in red) from 1914 positions of 60 sequences using ribosomal proteins. The percentage of replicate trees in which the associated taxa clustered together in the bootstrap test (100 replicates) are shown. Initial tree for the heuristic search were obtained automatically by applying Neighbor-Joining and BioNJ algorithms to a matrix of pairwise distances estimated using a JTT model. Used reference genomes with accession numbers can be found in Table S1.

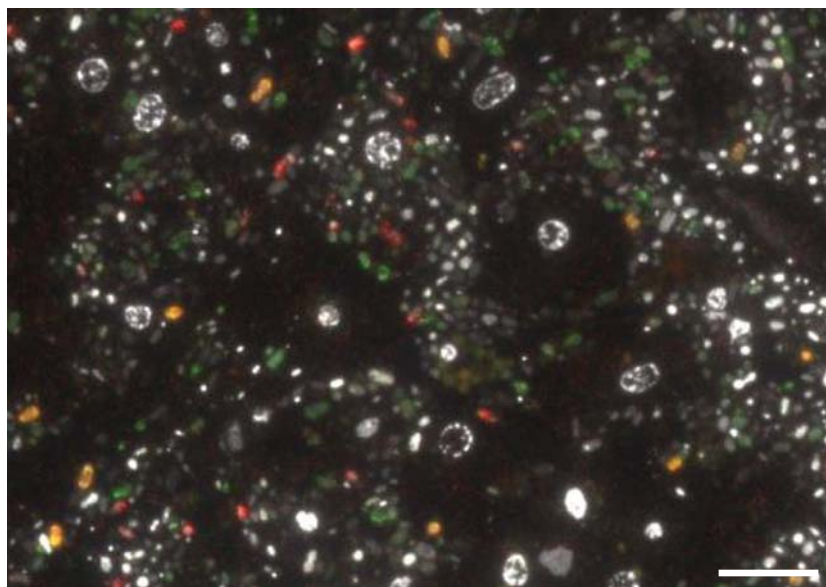

Figure 2B: Distribution of *Chloroflexi* classes/ clades in *Aplysina aerophoba* mesohyl using FISH: SAR202 cells are displayed in green, Caldilineae in orange, and Anaerolineae cells are red. DAPI signal is shown in white/ grey for better contrast. Scale bar: 10  $\mu$ m



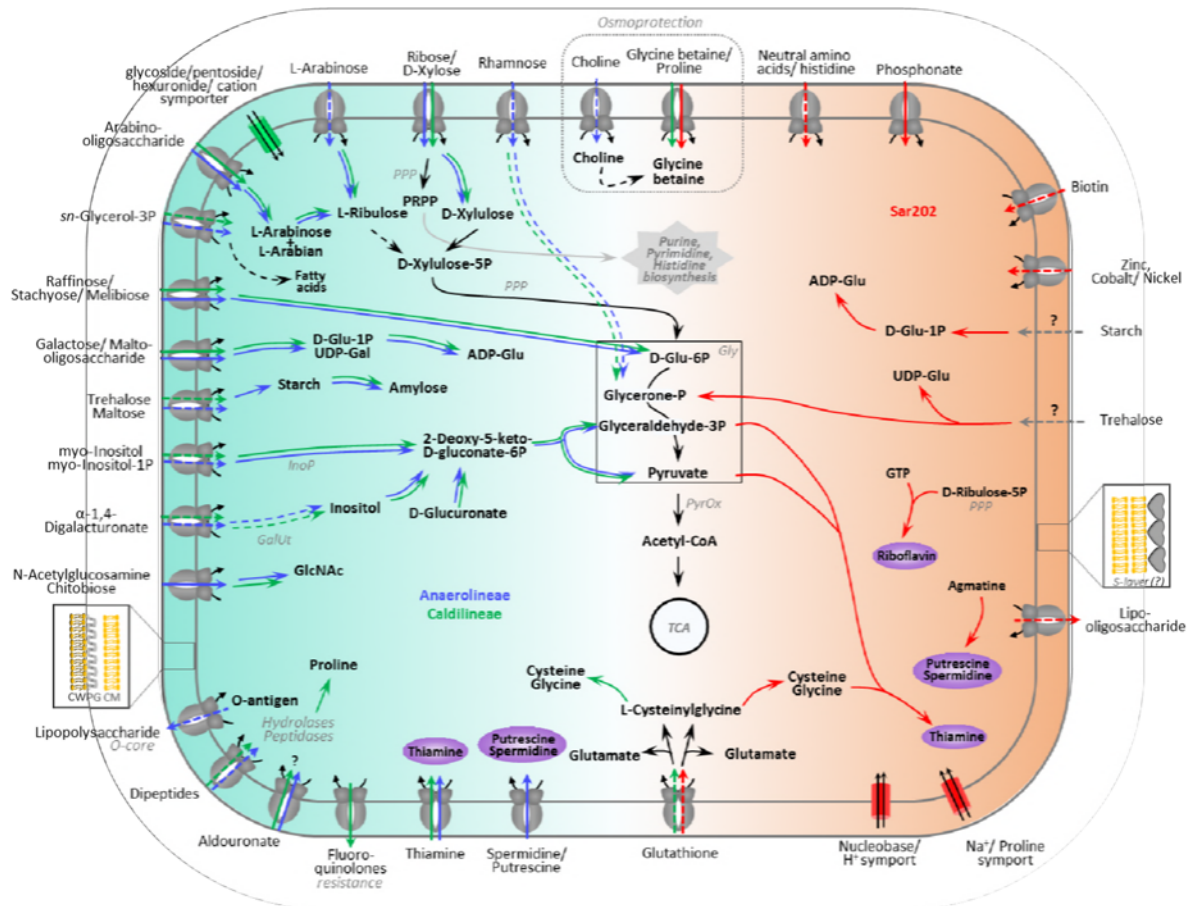

Figure 3: Summarized metabolic features which were found only in Anaerolineae and Caldilineae (left side, blue and green arrows) or in SAR202 genomes (right side, red arrows). The central metabolic pathways (glycolysis, TCA cycle, purine, pyrimidine histidine biosynthesis) located in the figure center are general features found in all genomes. Lines are dashed when pathways or transporter could not be annotated completely (single enzymes of the pathway or genes from the transporter where missing) or could not be annotated in both genomes of one clade.

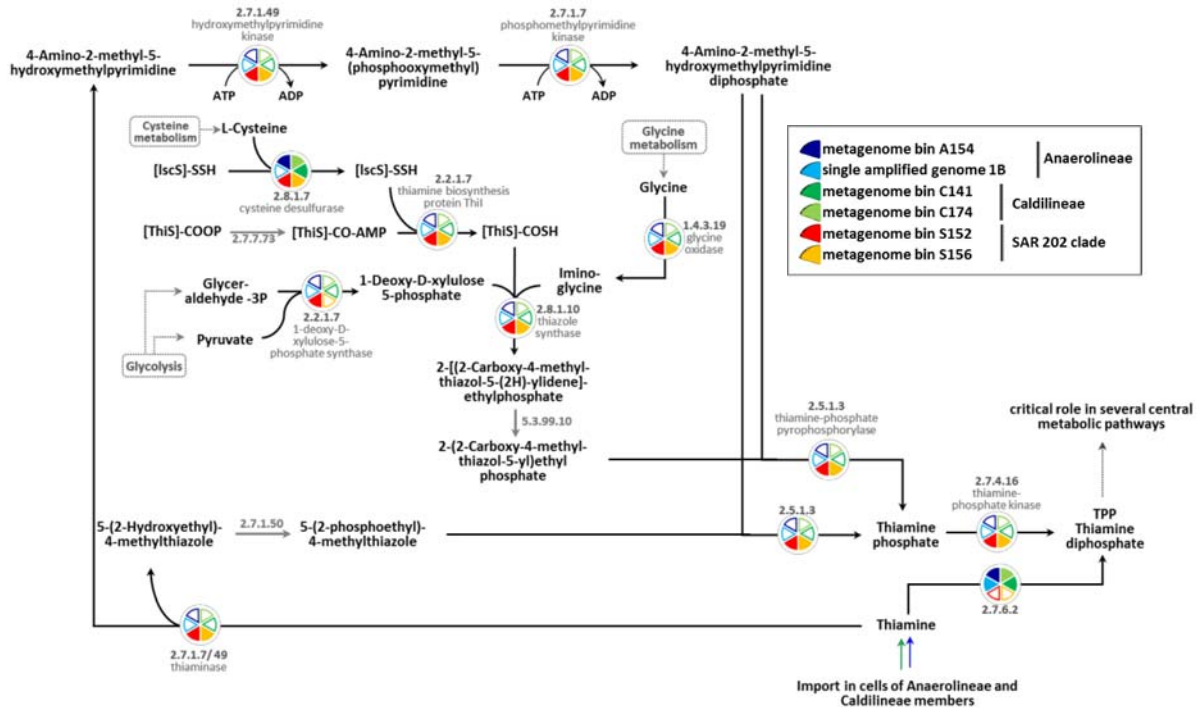

Figure 4A: Pathway encoding for synthesis of thiamine in both SAR202 genomes (yellow and red pie symbols) could be annotated almost complete. Members of classes Anaerolineae and Caldilineae encode for the import of thiamine (blue and green arrow indicating import).

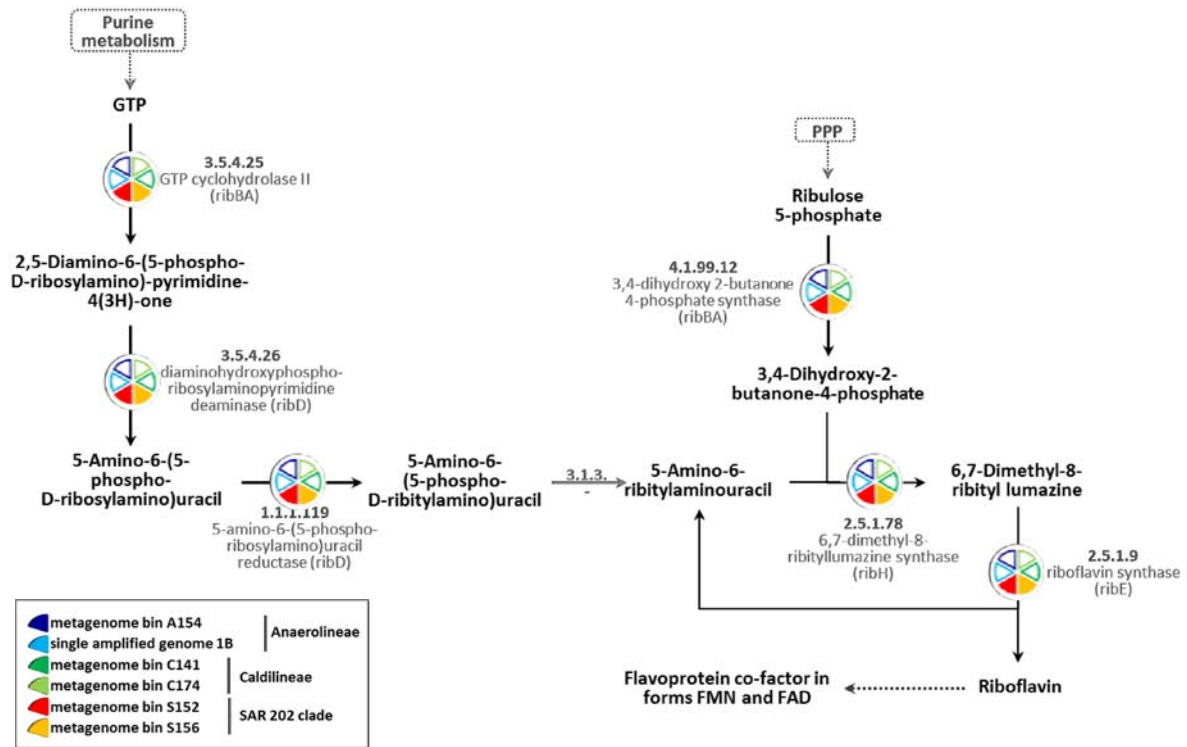

Figure 4B: Pathway encoding for synthesis of riboflavin in both SAR202 genomes (yellow and red pie symbols) could be annotated almost complete. The conversion of Riboflavin in the biological active forms (FMN and FAD) was encoded in the genomes of all three classes.

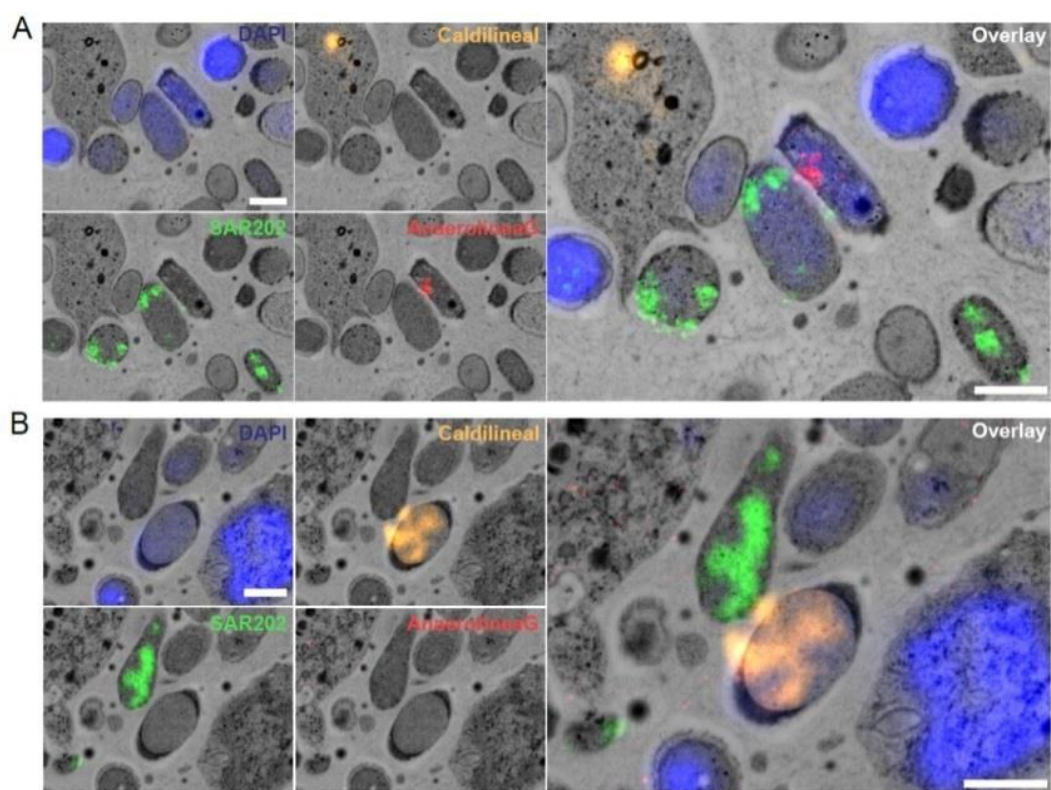

Figure 5: Visualization of sponge-associated *Chloroflexi* in *Aplysina aerophoba* mesohyl using FISH-CLEM: SAR202 cells are displayed in green (panel A and B) Caldilineae in orange (panel B) Anaerolineae in red (panel A). The nucleotide stain DAPI (blue) served as reference for the localization of unstained cells. In both panels the picture on the right is the overlay of all probes and DAPI. scale bars 1  $\mu$ m.

Table1: Overview of genomes analyzed in this study

| Name          | Taxon ID   | Genome Size (Mbp) | Scaffold Count | GC (%) | Gene count |      |     |      |           | Completeness estimation (IMG) |
|---------------|------------|-------------------|----------------|--------|------------|------|-----|------|-----------|-------------------------------|
|               |            |                   |                |        | Total      | CDS  | RNA | tRNA | w/o func. |                               |
| <b>SAG 1B</b> | 2617270794 | 2.78              | 325            | 58.9   | 2714       | 2679 | 35  | 24   | 639       | 55.8                          |
| <b>SAG 1G</b> | 2617270795 | 1.69              | 307            | 58.1   | 1694       | 1676 | 18  | 14   | 438       | 32.0                          |
| <b>SAG 1H</b> | 2617270796 | 1.73              | 352            | 59.1   | 1774       | 1752 | 22  | 17   | 458       | 31.9                          |
| <b>SAG 4H</b> | 2617270812 | 0.16              | 51             | 58.4   | 175        | 168  | 7   | 4    | 43        | 0                             |
| <b>A154*</b>  | 2619619053 | 3.73              | 107            | 59.3   | 3358       | 3307 | 51  | 47   | 613       | 91.8                          |
| <b>SAG 2D</b> | 2617270806 | 3.51              | 489            | 58.4   | 3207       | 3177 | 30  | 24   | 855       | 65.5                          |
| <b>SAG 3B</b> | 2617270807 | 2.02              | 310            | 59.2   | 1844       | 1823 | 21  | 17   | 444       | 38.7                          |
| <b>SAG 3H</b> | 2617270810 | 2.47              | 290            | 58.9   | 2271       | 2242 | 29  | 24   | 641       | 50.9                          |
| <b>SAG 4A</b> | 2617270811 | 3.35              | 437            | 59.4   | 3024       | 2994 | 30  | 26   | 777       | 64.8                          |
| <b>SAG 5H</b> | 2617270814 | 1.26              | 183            | 58.4   | 1132       | 1112 | 20  | 17   | 288       | 17.2                          |
| <b>SAG 6B</b> | 2617270816 | 4.25              | 685            | 58.7   | 3943       | 3901 | 42  | 35   | 1154      | 66.8                          |
| <b>SAG 6C</b> | 2617270818 | 2.75              | 414            | 58.5   | 2579       | 2544 | 35  | 28   | 703       | 45.9                          |
| <b>SAG 6F</b> | 2617270820 | 3.66              | 839            | 58.4   | 3594       | 3561 | 33  | 25   | 1063      | 56.5                          |
| <b>C-141*</b> | 2619619051 | 4.59              | 507            | 63.0   | 4288       | 4236 | 52  | 46   | 1246      | 90.9                          |
| <b>C-174*</b> | 2619619055 | 6.36              | 647            | 58.4   | 5662       | 5601 | 61  | 55   | 1472      | 96.3                          |
| <b>SAG 3D</b> | 2617270809 | 0.58              | 106            | 60.5   | 622        | 608  | 14  | 13   | 145       | 25.4                          |
| <b>S152*</b>  | 2619619052 | 5.03              | 890            | 56.9   | 5448       | 5378 | 70  | 60   | 1938      | 91.1                          |
| <b>S156*</b>  | 2619619054 | 3.35              | 334            | 65.6   | 3463       | 3402 | 61  | 52   | 964       | 98.0                          |

IMG Gold Study IDs: Gs0114494; \*Gs0099546

The letters of the bins reflect the phylogenetic identity of the bin ("A"= Anaerolineae, "C"= Caldilineae, "S"= SAR202).

**Table2: Sponge specific features of selected genomes.**

| Class/ clade | Name   | Taxon ID   | CRISPR                                           |              | ANK | secondary metabolite gene cluster |         |       |
|--------------|--------|------------|--------------------------------------------------|--------------|-----|-----------------------------------|---------|-------|
|              |        |            | CRISPRfinder<br>Total (No of repeats per spacer) | IMG<br>Total |     | type 1 PKS                        | terpene | other |
| Anaerolineae | SAG 1B | 2617270794 | -                                                | -            | 1   | -                                 | -       | -     |
|              | A154*  | 2619619053 | -                                                | -            | 2   | -                                 | -       | -     |
| Caldilineae  | C141*  | 2619619051 | 7 (27, 24, 13, 7, 3, 30, 4)                      | 9            | 9   | 2                                 | -       | -     |
|              | C174*  | 2619619055 | 5 (21, 24, 8, 32, 27)                            | 8            | 1   | -                                 | 1       | -     |
| Sar202       | S152*  | 2619619052 | 5 (7, 34, 26, 7, 4)                              | 9            | 5   | 3                                 | 4       | 1     |
|              | S156*  | 2619619054 | 1 (13)                                           | 3            | 2   | 1                                 | 2       | 1     |

IMG Gold Study IDs: Gs0114494; \*Gs0099546 - extracted metagenome bins; ANK: Ankyrins and Ankyrin-repeat containing proteins; secondary metabolite cluster found using antiSMASH 3.0; values are total numbers of genes per genome. The letters of the bins reflect the phylogenetic identity of the bin ("A"= Anaerolineae, "C"= Caldilineae, "S"= SAR202).
